# Supplementary material for: Selective collection of Yb(iii) over La(iii) and Eu(iii) from aqueous solution by bis(tetramethylammonium) salt crystals of p-tert-butylcalix[4]arene-1,3-diphosphonic acid
Source: Royal Society of Chemistry journal article supplement (doi:10.1039/d3ce00525a), 2023-01-01
Supplement: d3ce00525a1.pdf [file d3ce00525a1.pdf]

## Supporting Information

Selective collection of Yb(III) over La(III) and Eu(III) from aqueous solution by bis(tetramethylammonium) salt crystals of *p-tert*-butylcalix[4]arene-1,3-diphosphonic acid

Naoya Morohashi,<sup>\*a</sup> Mayu Osawa,<sup>a</sup> Vandana Bhalla,<sup>b</sup> Sahoko Sumida,<sup>a</sup> Yutaka Kato,<sup>a</sup>  
Ryuki Takahashi,<sup>a</sup> Nobuhiko Iki<sup>c</sup> and Tetsutaro Hattori<sup>\*a</sup>

<sup>a</sup> *Department of Biomolecular Engineering, Graduate School of Engineering, Tohoku University, 6-6-11 Aramaki-Aoba, Aoba-ku, Sendai, Miyagi 980-8579, Japan.*

<sup>b</sup> *Department of Chemistry, UGC Centre of Advanced Study-II, Guru Nanak Dev University, Amritsar 143005, Punjab, India*

<sup>c</sup> *Graduate School of Environmental Studies, Tohoku University, 6-6-07 Aramaki-aza Aoba, Aoba-ku, Sendai, Miyagi 980-8579, Japan.*

### Contents:

|                                                                                                            |     |
|------------------------------------------------------------------------------------------------------------|-----|
| I. General                                                                                                 | S2  |
| II. Preparation of bis(tetramethylammonium) salt [(Me <sub>4</sub> N) <sub>2</sub> H <sub>2</sub> L]       | S3  |
| III. Single-crystal XRD analysis of H <sub>4</sub> L and (Me <sub>4</sub> N) <sub>2</sub> H <sub>2</sub> L | S5  |
| IV. PXRD analysis                                                                                          | S10 |
| V. Extraction experiment of Ln(III)                                                                        | S12 |
| VI. ESI-MS measurement                                                                                     | S15 |
| VII. Back-extraction of Yb(III)                                                                            | S16 |
| VIII. References                                                                                           | S17 |

## I. General

Inductively coupled plasma optical emission spectra (ICP-OES) were measured using a Thermo Fisher Scientific iCAP6500.  $^1\text{H}$  NMR spectra were measured on a 400 MHz spectrometer using  $\text{CD}_3\text{OD}$  as a solvent. SEM-EDX analysis was performed using HITACHI S-4800 and HORIBA EX-250. ESI-MS measurement was performed using Bruker solariX. **H<sub>4</sub>L** was prepared as previously reported.<sup>[1]</sup> Reagent-grade chemicals and solvents were used as purchased. Stock solutions of each Ln(III) [La(III), Eu(III) and Yb(III)] were prepared by dissolving  $\text{YbCl}_3 \cdot 6\text{H}_2\text{O}$ ,  $\text{EuCl}_3 \cdot 6\text{H}_2\text{O}$  and  $\text{LaCl}_3 \cdot 7\text{H}_2\text{O}$  in an aqueous solution of HCl, respectively.

## II. Preparation of bis(tetramethylammonium) salt [(Me<sub>4</sub>N)<sub>2</sub>H<sub>2</sub>L]

To a stirred solution of **H<sub>4</sub>L** (100.0 mg, 129 μmol) in methanol (30 mL) was added Me<sub>4</sub>NOH (25% in H<sub>2</sub>O, 101.4 μL, 284 μmol), and the mixture was stirred at room temperature for 24 h. The resulted solution was concentrated by evaporation and anhydrous tetrahydrofuran (15 mL) was added to solution. The precipitation was collected by filtration and dried in vacuo (0.5–1.0 kPa) at 60 °C to give **(Me<sub>4</sub>N)<sub>2</sub>H<sub>2</sub>L** as a colorless powder (92.0 mg, 77 %). **(Me<sub>4</sub>N)<sub>2</sub>H<sub>2</sub>L**: mp 308.7–311.4 °C (decomp.); <sup>1</sup>H NMR (400 MHz, CD<sub>3</sub>OD) δ (ppm): 0.85 (s, 18H), 1.33 (s, 18H), 3.22 (s, 24H), 3.43 (d, 4H, *J* = 14.0 Hz), 5.45 (d, 4H, *J* = 14.0 Hz), 6.71 (d, 4H, *J* = 3.60 Hz, *ArH*), 7.08 (s, 4H); <sup>13</sup>C NMR(100 MHz, CD<sub>3</sub>OD) δ (ppm): 31.3, 32.3, 34.6, 34.8, 38.5, 38.5, 56.0, 56.1, 56.1, 126.8, 126.9, 126.9, 131.0, 141.9, 143.6, 143.7, 150.9, 150.9, 152.3 ; IR (KBr) cm<sup>-1</sup>: 3386, 2960, 1487, 1149, 1037. Anal. Calcd for C<sub>52</sub>H<sub>88</sub>N<sub>2</sub>O<sub>12</sub>P<sub>2</sub> [(Me<sub>4</sub>N)<sub>2</sub>H<sub>2</sub>L·(H<sub>2</sub>O)<sub>4</sub>]: C, 62.76; H, 8.91; N, 2.81. Found: C, 62.44; H, 9.00; N, 3.09.

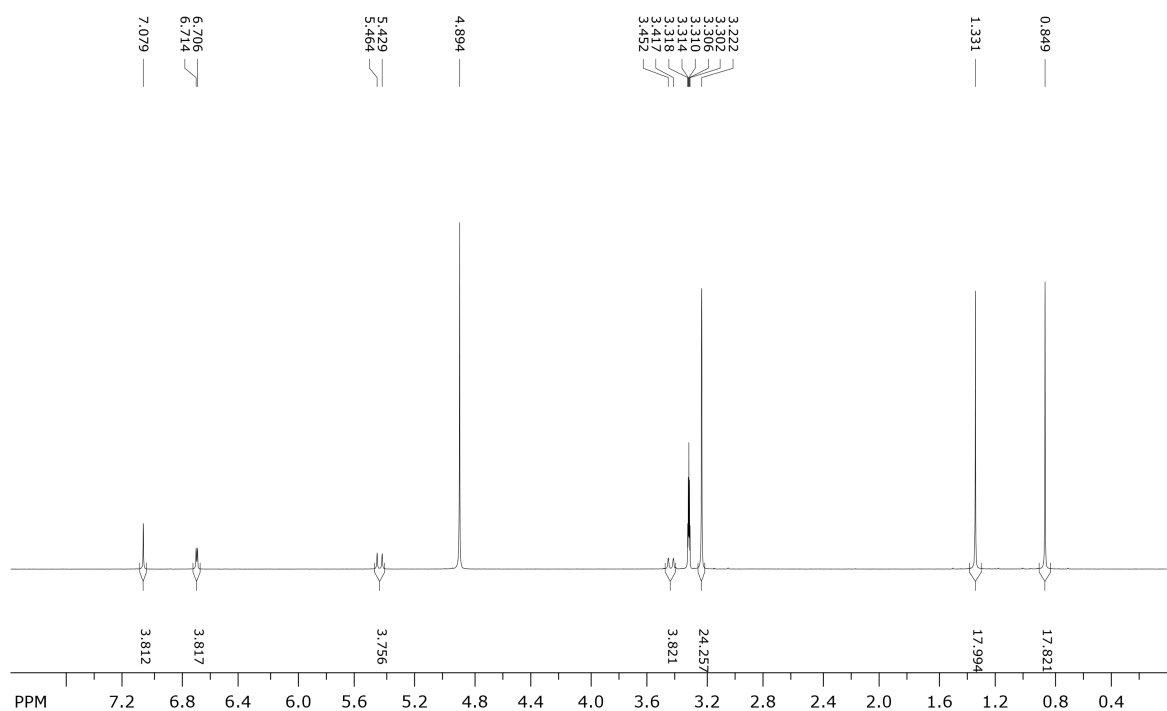

**Figure S1.** <sup>1</sup>H NMR spectrum of **(Me<sub>4</sub>N)<sub>2</sub>H<sub>2</sub>L** (CD<sub>3</sub>OD, 400 MHz).

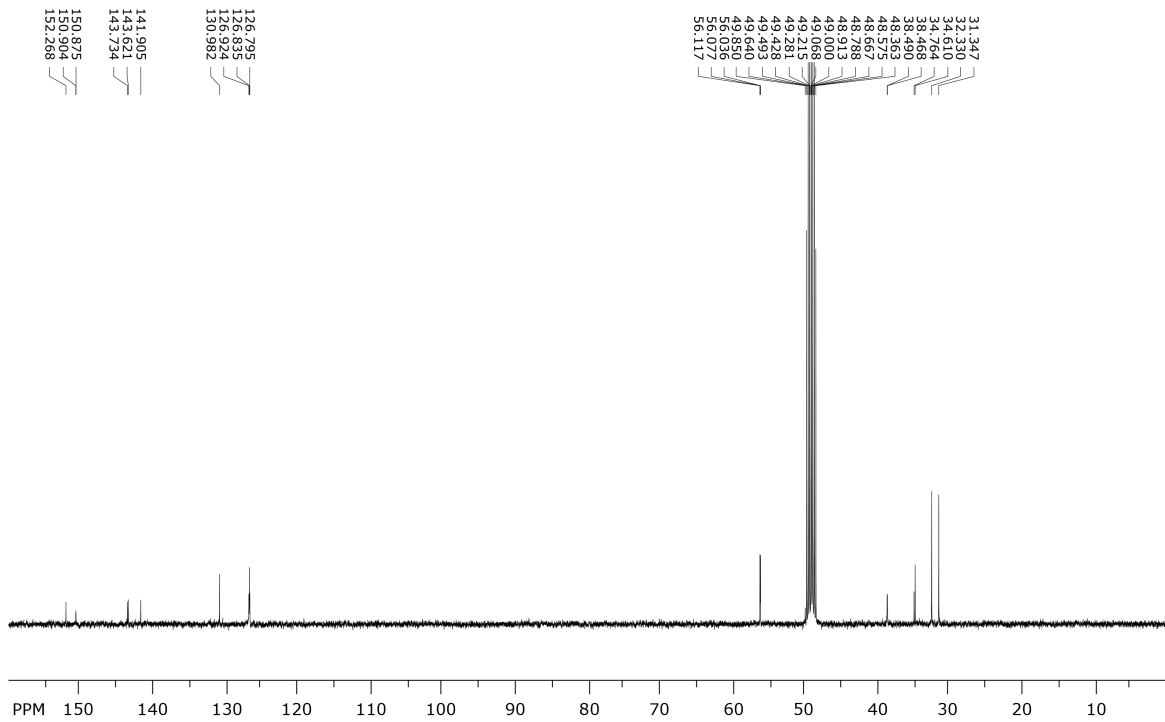

**Figure S2.**  $^{13}\text{C}$  NMR spectrum of  $(\text{Me}_4\text{N})_2\text{H}_2\text{L}$  ( $\text{CD}_3\text{OD}$ , 100 MHz).

### III. Single-crystal XRD analysis of **H<sub>4</sub>L** and **(Me<sub>4</sub>N)<sub>2</sub>H<sub>2</sub>L**

Single crystals of **H<sub>4</sub>L**·(H<sub>2</sub>O)<sub>0.2</sub> were accidentally obtained by leaving a solution of **H<sub>4</sub>L** in the mixture of CH<sub>3</sub>CN with H<sub>2</sub>O containing NaOH (0.005 M) after addition of 0.01 M HCl solution containing YbCl<sub>3</sub>. This crystal has different packing structure compared to previously reported crystal<sup>[1]</sup> of **H<sub>4</sub>L** due to the difference of included solvent. Single crystals of **[(Me<sub>4</sub>N)<sub>2</sub>H<sub>2</sub>L]**·MeOH·H<sub>2</sub>O were prepared by vapor diffusion of tetrahydrofuran to methanol solution of **(Me<sub>4</sub>N)<sub>2</sub>H<sub>2</sub>L**.

Single-crystal X-ray diffraction data were collected on a Bruker APEX-II with a CCD diffractometer equipped with a multilayered confocal mirror and a fine-focus rotating anode, using Mo-*K*α radiation ( $\lambda = 0.71073 \text{ \AA}$ ). The structure was solved by the direct method by SHELXL-97<sup>[2]</sup> and refined by the least-squares method on  $F^2$  using SHELXL-2017.<sup>[3]</sup> Yadokari-XG 2009 was used as a GUI for SHELXL-97 and SHELXL-2017.<sup>[4]</sup> In the refinement of **[(Me<sub>4</sub>N)<sub>2</sub>H<sub>2</sub>L]**·MeOH·H<sub>2</sub>O,  $\theta_{\max}$  was set in 23.5° due to weak diffraction.

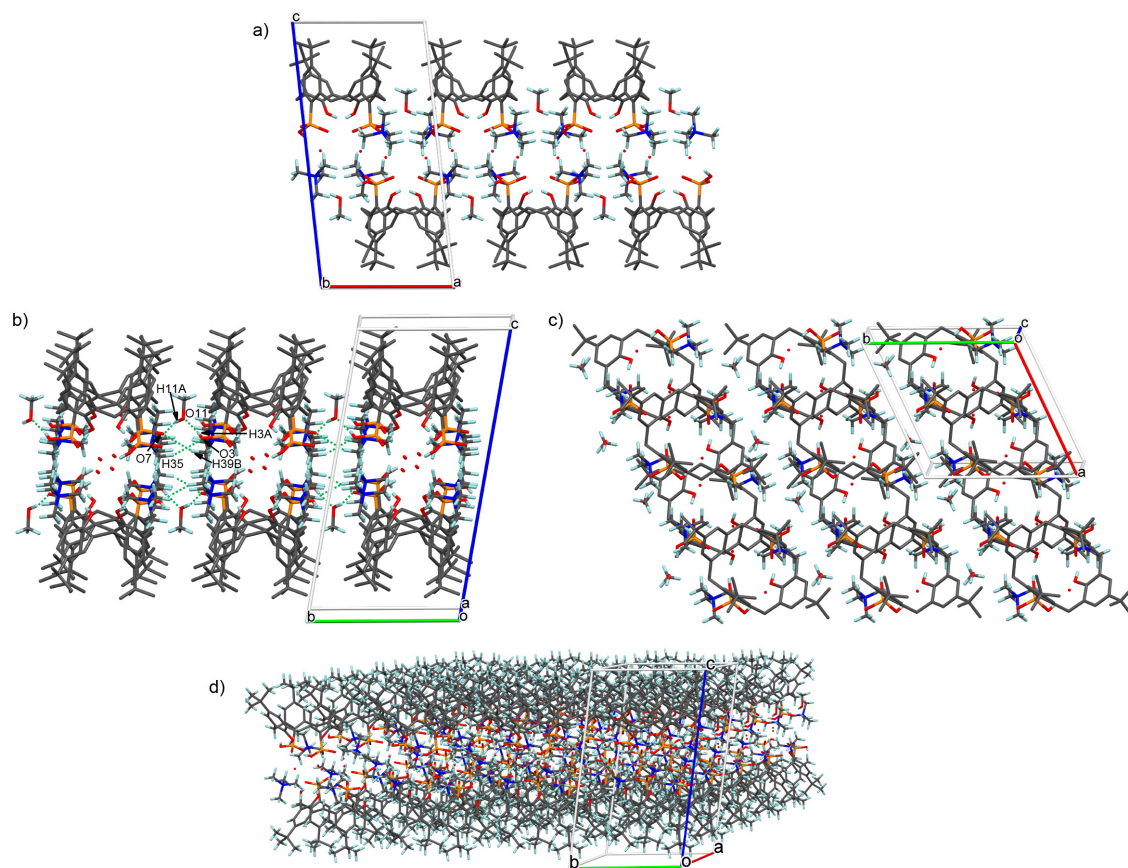

**Figure S3.** X-ray structure of  $[(\text{Me}_4\text{N})_2\text{H}_2\text{L}] \cdot \text{MeOH} \cdot \text{H}_2\text{O}$  : cross-sections of sheet structure parallel to the  $a$ - $c$  plane (a), the  $b$ - $c$  plane (b), and the  $a$ - $b$  plane (c) and a sheet structure parallel to the  $a$ - $b$  plane (d). Each  $\text{H}_2\text{O}$  molecule are disordered at two positions. In (a, b), selected hydrogen atoms and disordered atoms for *tert*-butyl groups are omitted for clarity. Green dotted lines represent intermolecular hydrogen bonds. Selected distances:  $\text{O}3 \cdots \text{H}35$  (2.482 Å),  $\text{O}7 \cdots \text{H}11\text{A}$  (1.814 Å),  $\text{O}7 \cdots \text{H}39\text{B}$  (2.508 Å),  $\text{O}11 \cdots \text{H}3\text{A}$  (1.836 Å).

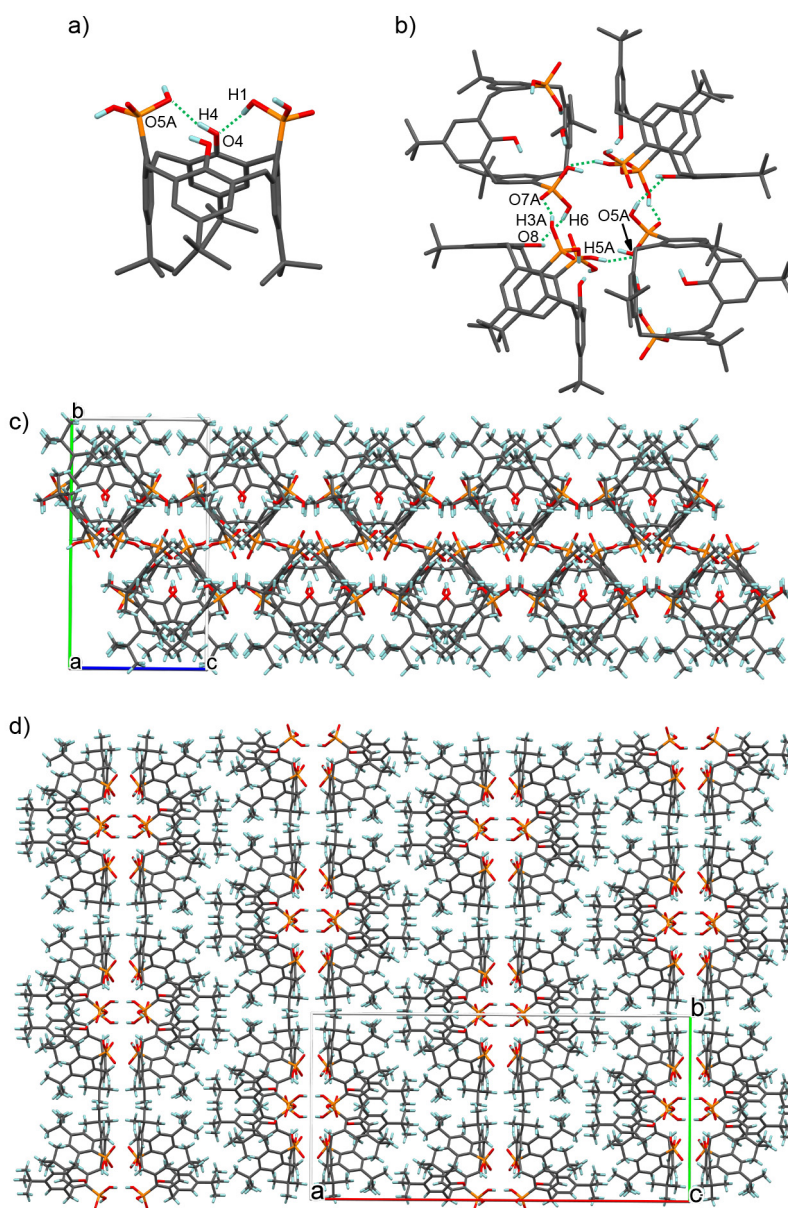

**Figure S4.** X-ray structure of  $\text{H}_4\text{L} \cdot (\text{H}_2\text{O})_{0.2}$ : side view of  $\text{H}_4\text{L}$  (a), an aggregate of selected four molecules (b), a columnar structure along the  $c$  axis (c), and parallel cross-section to the  $a$ - $b$  plane (d). In (a, b), selected hydrogen atoms, disordered atoms and solvent molecules are omitted for clarity. Green dotted lines represent intra- and intermolecular hydrogen bonds. Selected distances: (a)  $\text{O4} \cdots \text{H1}$  (1.784 Å),  $\text{O5A} \cdots \text{H4}$  (1.852 Å), (b)  $\text{O5A} \cdots \text{H5A}$  (1.779 Å),  $\text{O7A} \cdots \text{H3A}$  (1.643 Å),  $\text{O8} \cdots \text{H6}$  (2.198 Å).

**Table S1.** Crystallographic Data for **H<sub>4</sub>L** and **(Me<sub>4</sub>N)<sub>2</sub>H<sub>2</sub>L**

|                                                                                      | <b>H<sub>4</sub>L</b> ·(H <sub>2</sub> O) <sub>0.2</sub>          | <b>[(Me<sub>4</sub>N)<sub>2</sub>H<sub>2</sub>L]</b> ·MeOH·H <sub>2</sub> O   |
|--------------------------------------------------------------------------------------|-------------------------------------------------------------------|-------------------------------------------------------------------------------|
| Empirical formula                                                                    | C <sub>44</sub> H <sub>58.4</sub> O <sub>8.2</sub> P <sub>2</sub> | C <sub>53</sub> H <sub>86</sub> N <sub>2</sub> O <sub>10</sub> P <sub>2</sub> |
| Formula weight                                                                       | 780.44                                                            | 973.17                                                                        |
| Crystal system                                                                       | monoclinic                                                        | triclinic                                                                     |
| Space group                                                                          | <i>C2/c</i>                                                       | <i>P</i> $\bar{1}$                                                            |
| <i>a</i> , <i>b</i> , <i>c</i> / Å                                                   | 40.637(6), 19.488(3),<br>10.9137(16)                              | 11.762(10), 12.090(10),<br>21.684(18)                                         |
| $\alpha$ , $\beta$ , $\gamma$ / °                                                    | 90, 102.487(2), 90                                                | 96.168(13), 93.167(13),<br>114.670(11)                                        |
| <i>V</i> / Å <sup>3</sup>                                                            | 8439(2)                                                           | 2769(4)                                                                       |
| <i>Z</i>                                                                             | 8                                                                 | 2                                                                             |
| F(000)                                                                               | 3344                                                              | 1056                                                                          |
| <i>T</i> / K                                                                         | 223(2)                                                            | 223(2)                                                                        |
| $\rho_{\text{calc}}$ / gcm <sup>-3</sup>                                             | 1.229                                                             | 1.167                                                                         |
| Reflections collected                                                                | 24095                                                             | 11621                                                                         |
| Independent reflections                                                              | 9571 [ <i>R</i> <sub>int</sub> = 0.1057]                          | 8093 [ <i>R</i> <sub>int</sub> = 0.1573]                                      |
| $\mu$ (Mo K $\alpha$ ) / mm <sup>-1</sup>                                            | 0.154                                                             | 0.133                                                                         |
| Data / restraints / parameters                                                       | 9571 / 736 / 656                                                  | 8093 / 460 / 693                                                              |
| <i>R</i> <sub>1</sub> , <i>wR</i> <sub>2</sub> ( <i>I</i> > 2 $\sigma$ ( <i>I</i> )) | 0.0730, 0.1333                                                    | 0.0893, 0.2102                                                                |
| <i>R</i> <sub>1</sub> , <i>wR</i> <sub>2</sub> (all data)                            | 0.1919, 0.1872                                                    | 0.2487, 0.2716                                                                |
| Goodness-of-fit on <i>F</i> <sup>2</sup>                                             | 1.004                                                             | 0.826                                                                         |
| Largest diff. peak and hole / e·Å <sup>3</sup>                                       | 0.330 and -0.394                                                  | 0.755 and -0.314                                                              |



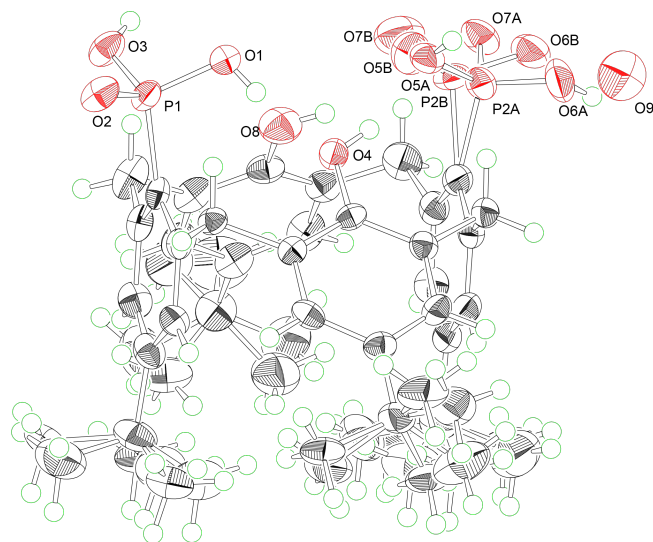

**Figure S5.** ORTEP drawing of  $\text{H}_4\text{L}\cdot(\text{H}_2\text{O})_{0.2}$  with 50% probability ellipsoids (CCDC 2262871).

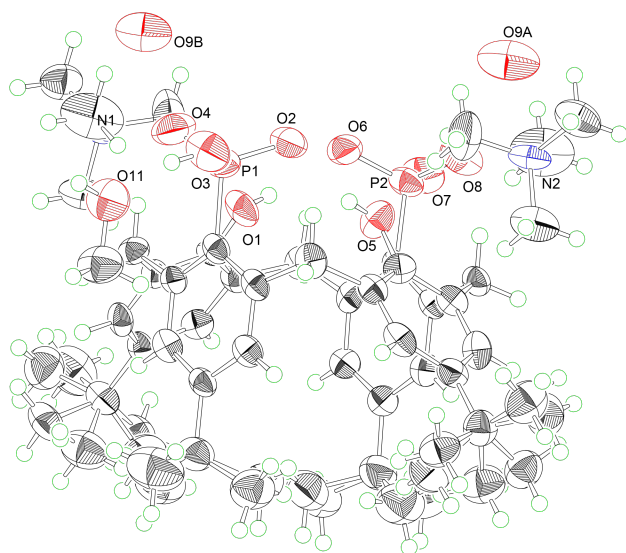

**Figure S6.** ORTEP drawing of  $[(\text{Me}_4\text{N})_2\text{H}_2\text{L}]\cdot\text{MeOH}\cdot\text{H}_2\text{O}$  with 50% probability ellipsoids (CCDC 2262872).

#### IV. PXRD analysis

Data were collected on a powder X-ray diffractometer using  $\text{CuK}\alpha$  radiation at increments of  $0.02^\circ$  and an exposure time of 1.2 s/step in the angular range  $3\text{--}30^\circ$  ( $2\theta$ ) at room temperature. The PXRD patterns of crystals of  $(\text{Me}_4\text{N})_2\text{H}_2\text{L}$ , in which each peak was observed at same region as shown in Fig. S7b, may slightly shift depending on the measurements.

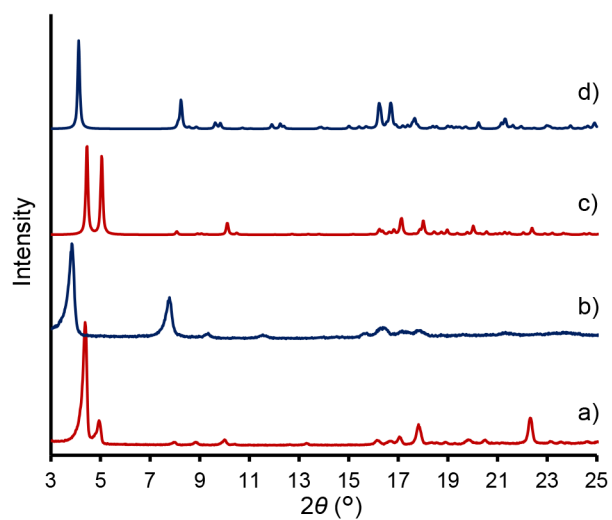

**Figure S7.** PXRD patterns of compound  $\text{H}_4\text{L}$  and  $(\text{Me}_4\text{N})_2\text{H}_2\text{L}$ : experimental data of compound  $\text{H}_4\text{L}$  (a) and  $(\text{Me}_4\text{N})_2\text{H}_2\text{L}$  (b) and simulation from XRD data of  $\text{H}_4\text{L}\cdot(\text{H}_2\text{O})_{0.2}$  (c) and  $[(\text{Me}_4\text{N})_2\text{H}_2\text{L}]\cdot\text{MeOH}\cdot\text{H}_2\text{O}$  (d).

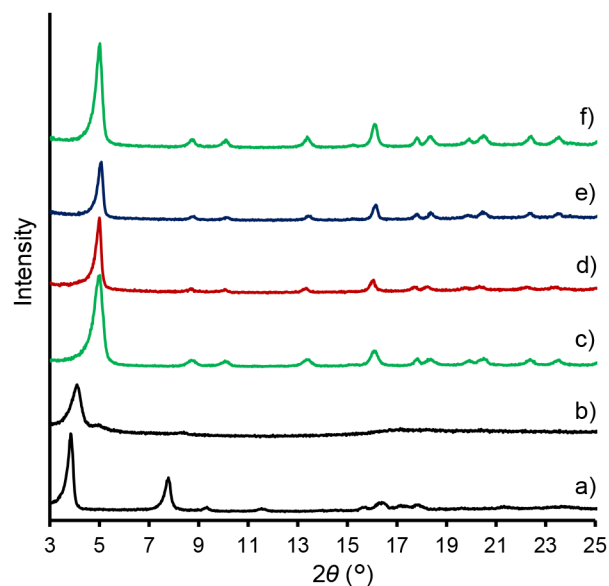

**Figure S8.** Changes in the PXRD pattern of **(Me<sub>4</sub>N)<sub>2</sub>H<sub>2</sub>L** (a) after extraction of Yb(III) for 1 h (b) and 24 h (c), La(III) for 168 h (d), Eu(III) for 24 h (e) and competitive extraction of Ln(III) for 24 h (f). Samples were prepared under the following conditions: Aq. phase (2 mL): [Metal]<sub>aq,init</sub> =  $3.0 \times 10^{-3}$  M (6.0  $\mu$ mol), [HCl] = 0.01 M. Solid phase: **(Me<sub>4</sub>N)<sub>2</sub>H<sub>2</sub>L** (6.0  $\mu$ mol). 60 °C.

## V. Extraction experiment of Ln(III)

Powdery crystals of compound **H<sub>4</sub>L** or compound **(Me<sub>4</sub>N)<sub>2</sub>H<sub>2</sub>L** (6.0 μmol) were placed in a screw cap vial (3.5 mL) equipped with a stir bar and suspended by the addition of an aqueous solution (2 mL) containing HCl (0.001–0.05 M) and La(III), Eu(III), and Yb(III) ([Metal]<sub>aq,init</sub>). The suspension was stirred at fixed temperature. After the crystals were removed by filtration using membrane filter (1.0 μm pore size), the concentration of the metal species remaining in the aqueous phase, [Metal]<sub>aq</sub>, was measured by ICP-OES. The percentage of extraction (*E*%) was calculated according to eq 1.

$$E\% = ([\text{Metal}]_{\text{aq,init}} - [\text{Metal}]_{\text{aq}}) / [\text{Metal}]_{\text{aq,init}} \times 100\% \quad (1)$$

where [Metal]<sub>aq</sub> is the concentration of the metal ion in the aqueous phase after the extraction. The ratio selectivity, *r*<sup>0</sup>(Ln), for the selectively extracted Ln(III) was calculated from *E*<sup>0</sup>(Ln) of each Ln(III) according to Eq 2.

$$r^0(\text{Ln}) = E\%(\text{Ln}) / [E\%(\text{La}) + E\%(\text{Eu}) + E\%(\text{Yb})] \times 100\% \quad (2)$$

**Table S2** The residual ratio (%) of Me<sub>4</sub>N<sup>+</sup> in the crystal of **(Me<sub>4</sub>N)<sub>2</sub>H<sub>2</sub>L** after treatment with aqueous solution of HCl in the absence of Ln(III).<sup>a</sup>

| [HCl] / M | Time / min | The residual ratio<br>(%) of Me <sub>4</sub> N <sup>+</sup> <sup>b</sup> |
|-----------|------------|--------------------------------------------------------------------------|
| 0.01      | 30         | 25                                                                       |
| 0.01      | 60         | 19                                                                       |
| 0.05      | 30         | 6                                                                        |
| 0.05      | 60         | 5                                                                        |

<sup>a</sup> Conditions: Aq. phase (1 mL): [HCl] = 0.01–0.05 M. Solid phase: **(Me<sub>4</sub>N)<sub>2</sub>H<sub>2</sub>L** (3.0 μmol), 30 °C.

<sup>b</sup> Estimated by <sup>1</sup>H NMR analysis. The residual ratio (%) of Me<sub>4</sub>N<sup>+</sup> in **(Me<sub>4</sub>N)<sub>2</sub>H<sub>2</sub>L** before the treatment with aqueous solution of HCl was defined as 100 %.

**Table S3.** Competitive extraction of light rare earth ions [Ln<sup>1</sup>(III)] and Yb(III) with crystals of (Me<sub>4</sub>N)<sub>2</sub>H<sub>2</sub>L.<sup>a</sup>

| Ln <sup>1</sup> (III) | <i>E</i> %            |         |
|-----------------------|-----------------------|---------|
|                       | Ln <sup>1</sup> (III) | Yb(III) |
| La(III)               | 0                     | 48      |
| Pr(III)               | 1                     | 40      |
| Ce(III)               | 6                     | 47      |

<sup>a</sup> Conditions: Aq. phase (2 mL): [Metal]<sub>aq,init</sub> = 3.0 × 10<sup>-3</sup> M [6.0 μmol each for Ln<sup>1</sup>(III) and Yb(III)], [HCl] = 0.01 M. Solid phase: (Me<sub>4</sub>N)<sub>2</sub>H<sub>2</sub>L (6.0 μmol), 60 °C, 48 h.

**Table S4.** Dependence of *E*% on the molar equivalent of each Ln(III) to (Me<sub>4</sub>N)<sub>2</sub>H<sub>2</sub>L for the competitive extraction of La(III), Eu(III) and Yb(III) with crystals of (Me<sub>4</sub>N)<sub>2</sub>H<sub>2</sub>L.<sup>a</sup>

| Molar equivalent of each<br>Ln(III) to (Me <sub>4</sub> N) <sub>2</sub> H <sub>2</sub> L | <i>E</i> % |         |         | <i>r</i> <sup>o</sup> %(Yb) |
|------------------------------------------------------------------------------------------|------------|---------|---------|-----------------------------|
|                                                                                          | La(III)    | Eu(III) | Yb(III) |                             |
| 0.33                                                                                     | 10         | 53      | 95      | 60                          |
| 0.5                                                                                      | 0          | 24      | 80      | 77                          |
| 1                                                                                        | 1          | 7       | 47      | 85                          |
| 2                                                                                        | 0          | 3       | 23      | 88                          |
| 3                                                                                        | 0          | 3       | 14      | 82                          |

<sup>a</sup> Conditions: Aq. phase (2 mL): [Metal]<sub>aq,init</sub> = 1.0 × 10<sup>-3</sup>–9.0 × 10<sup>-3</sup> M (2.0–18.0 μmol for each metal ions), [HCl] = 0.01 M. Solid phase: (Me<sub>4</sub>N)<sub>2</sub>H<sub>2</sub>L (6.0 μmol), 60 °C, 24 h.

**Table S5.** *E* % of La(III), Eu(III) and Yb(III) with crystals of **(Me<sub>4</sub>N)<sub>2</sub>H<sub>2</sub>L**.<sup>a</sup>

| Ln(III) | Time | <i>E</i> % |
|---------|------|------------|
| La(III) | 1    | 48         |
| La(III) | 24   | 48         |
| La(III) | 48   | 49         |
| Eu(III) | 1    | 58         |
| Eu(III) | 24   | 53         |
| Eu(III) | 48   | 57         |
| Yb(III) | 1    | 53         |
| Yb(III) | 24   | 57         |
| Yb(III) | 48   | 54         |

<sup>a</sup> Conditions: Aq. phase (2 mL): [Metal]<sub>aq,init</sub> = 3.0×10<sup>-3</sup> M (6.0 μmol), [HCl] = 0.01 M. Solid phase: **(Me<sub>4</sub>N)<sub>2</sub>H<sub>2</sub>L** (6.0 μmol), 60 °C, 24 h.

**Table S6.** Dependence of *E*% on the molar equivalent of Yb(III) to **(Me<sub>4</sub>N)<sub>2</sub>H<sub>2</sub>L** for the extraction of Yb(III) with crystals of **(Me<sub>4</sub>N)<sub>2</sub>H<sub>2</sub>L**.<sup>a</sup>

| Molar equivalent of<br>Yb(III) to <b>(Me<sub>4</sub>N)<sub>2</sub>H<sub>2</sub>L</b> | <i>E</i> %(Yb) | Molar equivalent of Yb(III)<br>collected to <b>(Me<sub>4</sub>N)<sub>2</sub>H<sub>2</sub>L</b> |
|--------------------------------------------------------------------------------------|----------------|------------------------------------------------------------------------------------------------|
| 0.25                                                                                 | 99             | 0.25                                                                                           |
| 0.5                                                                                  | 99             | 0.50                                                                                           |
| 1                                                                                    | 54             | 0.54                                                                                           |
| 2                                                                                    | 25             | 0.50                                                                                           |
| 3                                                                                    | 17             | 0.51                                                                                           |

<sup>a</sup> Conditions: Aq. phase (2 mL): [Metal]<sub>aq,init</sub> = 0.75 × 10<sup>-3</sup>–9.0 × 10<sup>-3</sup>M (1.5–18.0 μmol for metal ions), [HCl] = 0.01 M. Solid phase: **(Me<sub>4</sub>N)<sub>2</sub>H<sub>2</sub>L** (6.0 μmol), 60 °C, 24 h.

## VI. ESI-MS measurement

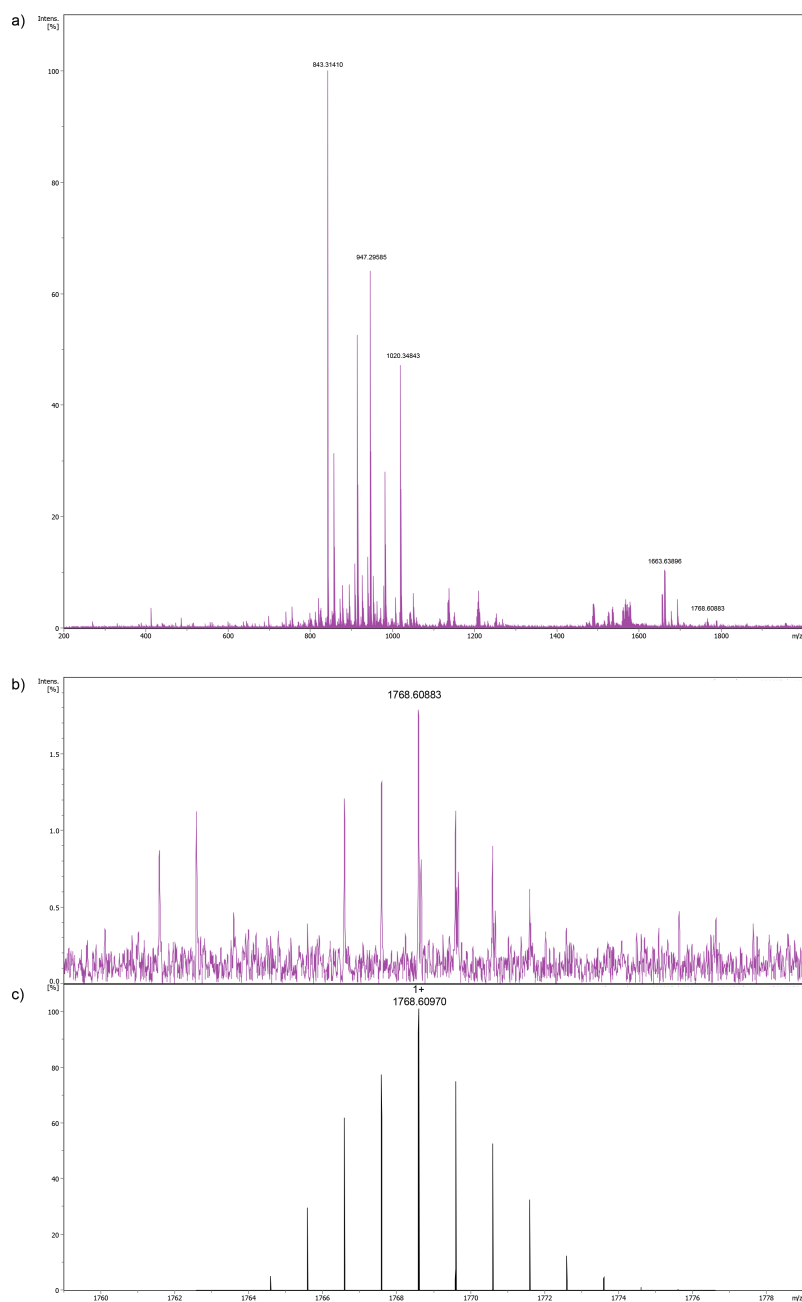

**Figure S9.** ESI-MS spectra of crystals after collection of Yb(III) (a), isotopic distribution patterns of experimental (b) and theoretical (c) for  $C_{88}H_{112}Na_2O_{16}P_4Yb [M-H+2Na]^+$ . Samples were prepared under the following conditions: Aq phase (2 mL) :  $[HCl] = 0.01 M$ ,  $[Yb(III)]_{aq,init} = 3.0 \times 10^{-3} M$ . Solid phase :  $(Me_4N)_2H_2L$  (6.0  $\mu mol$ ). 60 °C, 48 h.

## VII. Back-extraction of Yb(III)

Forward extraction was achieved from 2 mL of 0.01 M HCl containing Yb(III)  $[[\text{Metal}]_{\text{aq,init}} = 3.0 \times 10^{-3} \text{ M}; 6.0 \mu\text{mol}]$  with the crystals of  $(\text{Me}_4\text{N})_2\text{H}_2\text{L}$  (6.0  $\mu\text{mol}$ ). It was confirmed that saturated amount of Yb(III) was extracted to the crystals by the measurement of the residual metal ion concentration  $[\text{Metal}]_{\text{aq}}$  in the aqueous phase by ICP-OES. Obtained crystals of Yb(III) complex were placed in a screw cap vial (30 mL) was suspended by addition of 10 mL of methylisobutylketone and 10 mL of aqueous solution of 5 M acids (HCl,  $\text{H}_2\text{SO}_4$  and  $\text{H}_3\text{PO}_4$ ) and the resulting suspension was shaken for 24 h at 300 strokes per min at ambient temperature. After the aqueous phase was separated by centrifugation, the concentration of the metal ions in the aqueous phase,  $[\text{Metal}]_{\text{aq}'}$ , was measured by ICP-OES. Back extraction percentage ( $E^{\circ}_{\text{back}}$ ) defined as eq 3 was calculated.

$$E^{\circ}_{\text{back}} = (5 \times [\text{Metal}]_{\text{aq}'}) / ([\text{Metal}]_{\text{aq,init}} - [\text{Metal}]_{\text{aq}}) \times 100\% \quad (3)$$

**Table S7.** Back-extraction of Yb(III) extracted with crystals of  $(\text{Me}_4\text{N})_2\text{H}_2\text{L}$ .

| Acid                    | $E^{\circ}_{\text{back}}$ |
|-------------------------|---------------------------|
| HCl                     | 100                       |
| $\text{H}_2\text{SO}_4$ | 100                       |
| $\text{H}_3\text{PO}_4$ | 94                        |



## VIII. References

- [1] N. Morohashi, T. Hayashi, Y. Nakamura, T. Kobayashi, S. Tanaka and T. Hattori, *Chem. Lett.*, 2012, **41**, 1520–1522.
- [2] G. M. Sheldrick, *SHELX-97, Programs for the Refinement of Crystal structures*; University of Göttingen: Göttingen, Germany, 1997.
- [3] K. Wakita, *Yadokari-XG, Software for Crystal Structure Analyses*, 2001.
- [4] C. Kabuto, S. Akine, T. Nemoto and E. Kwon, *Nippon Kessho Gakkaishi*, 2009, **51**, 218–224.
